# Supplementary material for: Well-dispersed Pd nanoparticles on porous ZnO nanoplates via surface ion exchange for chlorobenzene-selective sensor
Source: RSC Adv. 2019 Dec 20;9(72):42351–9. doi: 10.1039/c9ra09705h (PMC9076696; doi:10.1039/c9ra09705h)
Supplement: RA-009-C9RA09705H-s001 [file RA-009-C9RA09705H-s001.pdf]

## ARTICLE

# Well-dispersed Pd nanoparticles on porous ZnO nanoplates via surface ion exchange for chlorobenzene-selective sensor

Received 00th January 20xx,  
Accepted 00th January 20xx

DOI: 10.1039/x0xx00000x

Zhenyu Feng,<sup>\*a</sup> Cuiling Gao,<sup>b</sup> Xicheng Ma<sup>a</sup> and Jinhua Zhan<sup>a</sup>

### Figure legends

**Fig. S1.** TEM images and EDS spectra of 1% Pd<sup>2+</sup>@ZnO, 3% Pd<sup>2+</sup>@ZnO, 5% Pd<sup>2+</sup>@ZnO, and 10% Pd<sup>2+</sup>@ZnO, and HRTEM image of porous ZnO nanoplate

**Fig. S2.** Pd 3d XPS spectra of 5% Pd<sup>2+</sup>@ZnO and 5% Pd@ZnO

**Fig. S3.** Response/recovery curves of 5% Pd@ZnO and pure ZnO sensors towards chlorobenzene

**Fig. S4.** Responses of 5% Pd@ZnO sensor toward chlorobenzene in different relative humidity

**Fig. S5.** Responses of 5% Pd@ZnO and pure ZnO sensors toward chlorobenzene, 1,2-dichlorobenzene, and 1,3-dichlorobenzene

**Fig. S6.** Nitrogen adsorption-desorption isotherms of 5% Pd@ZnO and pure porous ZnO nanoplates with BJH pore size distribution insets

**Table S1.** Chlorobenzene-sensing comparison among results obtained in this work and reported in the literature

<sup>a</sup> Key Laboratory for Colloid and Interface Chemistry of Education Ministry, School of Chemistry and Chemical Engineering, Shandong University, Jinan, Shandong, 250100, P. R. China.

<sup>b</sup> Shandong Institute for Product Quality Inspection, Jinan, Shandong, 250102, P. R. China.

\* Corresponding author. E-mail: fengzhenyu@sdu.edu.cn; Tel: +86 53188363768.

**Fig. S1**

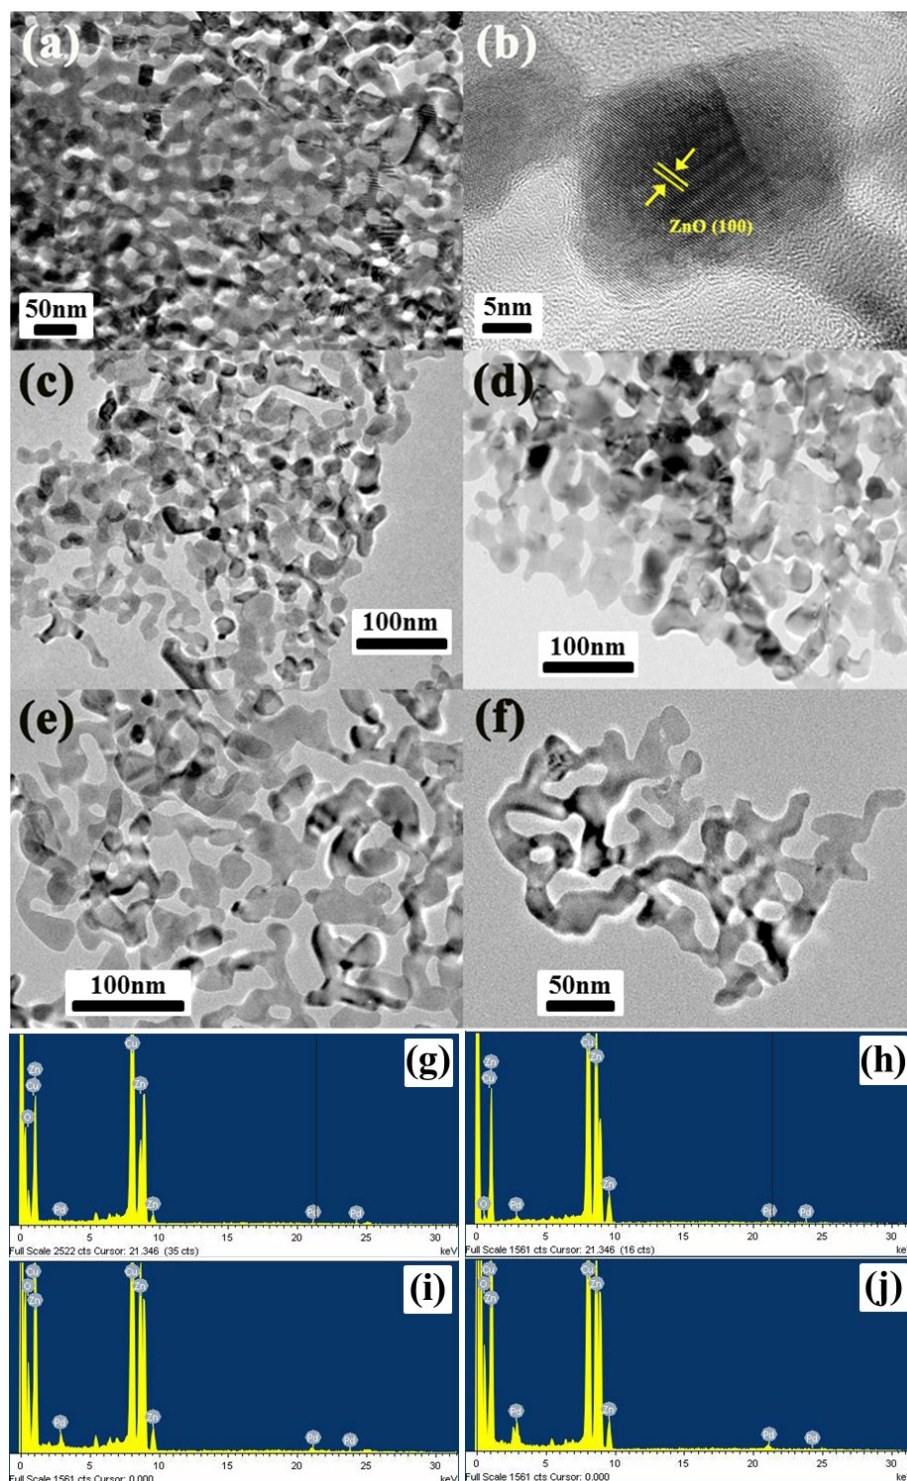

**Fig. S1.** (a), (c), (d), (e), and (f) represent TEM images of the pure ZnO, 1% Pd<sup>2+</sup>@ZnO, 3% Pd<sup>2+</sup>@ZnO, 5% Pd<sup>2+</sup>@ZnO, and 10% Pd<sup>2+</sup>@ZnO nanoplates, respectively. (b) shows HRTEM image of the pure ZnO nanoplate. (g), (h), (i), and (j) represent EDS spectra of the 1% Pd<sup>2+</sup>@ZnO, 3% Pd<sup>2+</sup>@ZnO, 5% Pd<sup>2+</sup>@ZnO, and 10% Pd<sup>2+</sup>@ZnO, respectively.

Fig. S2

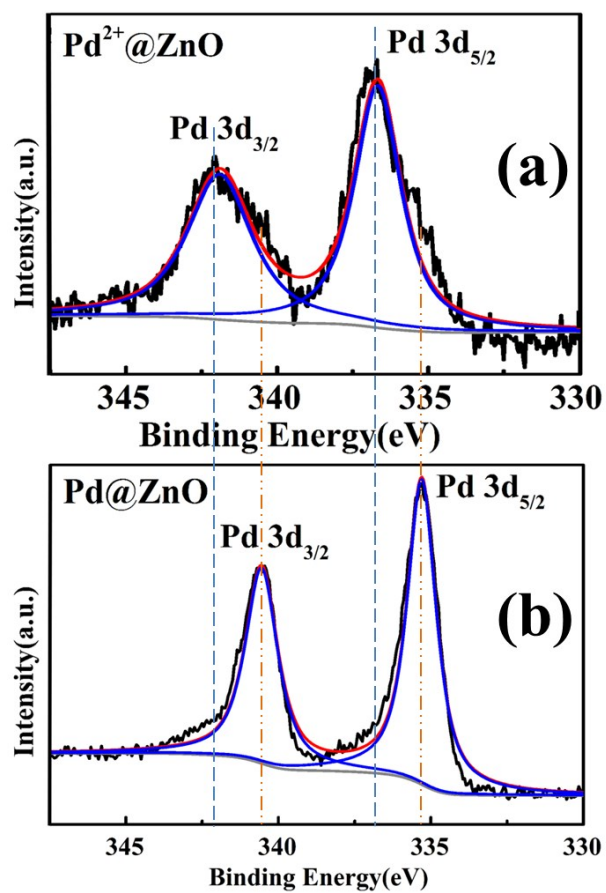

Fig. S2. Pd 3d XPS spectra of the obtained materials: (a) 5% Pd<sup>2+</sup>@ZnO and (b) 5% Pd@ZnO.

Fig. S3

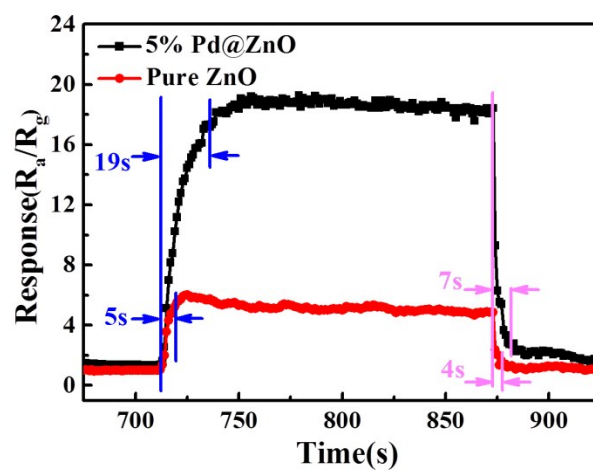

Fig. S3. Response/recovery curves of 5% Pd@ZnO and pure ZnO sensors towards chlorobenzene with 100 ppm at 440 °C.

**Fig. S4**

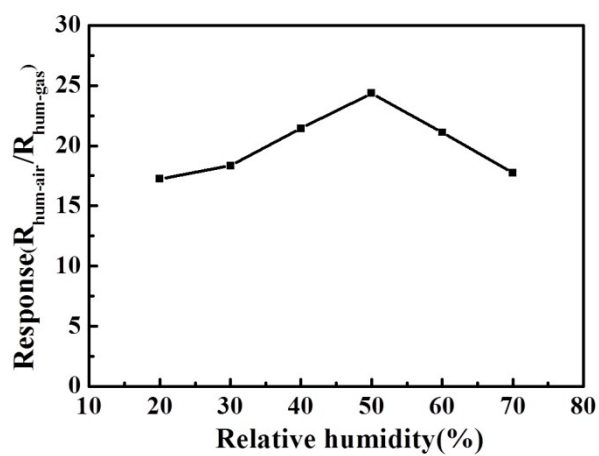

**Fig. S4.** Responses of 5% Pd@ZnO sensor toward 100 ppm chlorobenzene in different relative humidity at 440 °C. The response is defined as the ratio of sensor resistance ( $R_{\text{hum-air}}$ ) in humid air to that ( $R_{\text{hum-gas}}$ ) in humid air with 100 ppm chlorobenzene.

**Fig. S5**

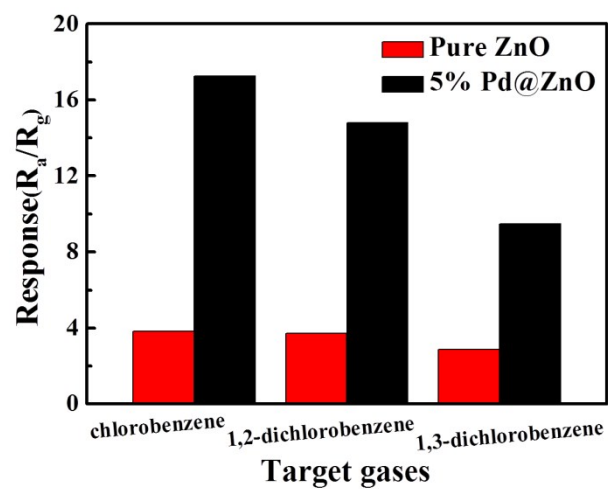

**Fig. S5.** Responses of 5% Pd@ZnO (black) and pure ZnO (red) sensors towards 100 ppm chlorobenzene compounds (gases) including chlorobenzene, 1,2-dichlorobenzene and 1,3-dichlorobenzene at 440 °C.

**Fig. S6**

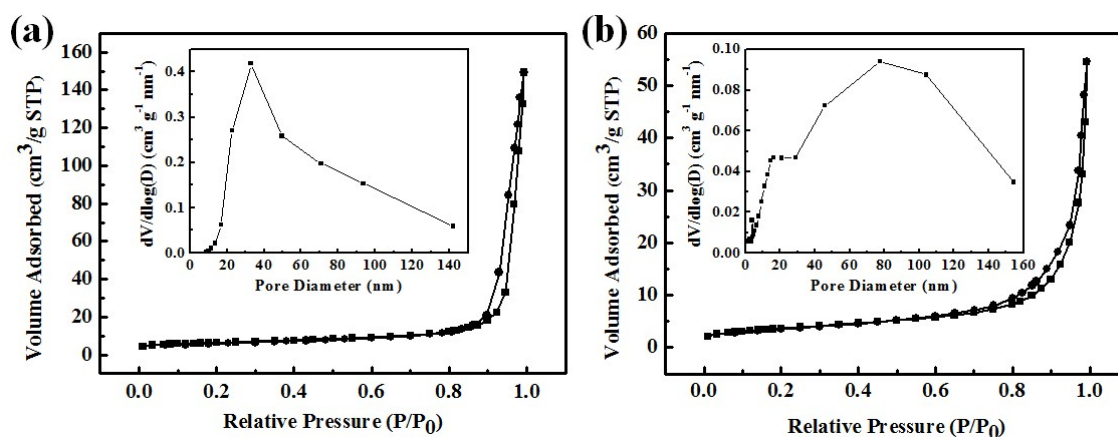

**Fig. S6.** Nitrogen adsorption-desorption isotherms with BJH pore size distribution insets of (a) pure porous ZnO nanoplates, (b) 5% Pd@ZnO. According to the IUPAC classification, the hysteresis loops corresponding to H3 type reveal the feature of mesoporous material. The specific surface areas of (a) and (b) are  $23.28 \pm 0.01$  and  $12.94 \pm 0.01$   $\text{m}^2/\text{g}$ , respectively.

**Table S1.** Chlorobenzene-sensing comparison among results obtained in this work and reported in the literature.

| Sensor materials                                          | Initial response temperature (°C) | Detection limit | Selectivity study | Response/recovery time (s) | Ref.      |
|-----------------------------------------------------------|-----------------------------------|-----------------|-------------------|----------------------------|-----------|
| Pd@ZnO                                                    | 240                               | 1 ppm           | Yes               | 19/7                       | This work |
| Prussian blue film                                        | 25                                | 24 ppm          | Yes               | 18/12                      | [1]       |
| Pt-decorated porous single-crystalline ZnO nanosheets     | 200                               | 30 ppb          | Yes               | 20/10                      | [2]       |
| In-doped coral-like SnO <sub>2</sub> nanostructures       | 170                               | 0.2 ppm         | -                 | 6.7/25.8                   | [3]       |
| In <sub>2</sub> O <sub>3</sub> nanorods and nanoparticles | 270                               | 10 ppm          | -                 | -                          | [4]       |
| Au-deposited porous single-crystalline ZnO nanoplates     | 260                               | 2 ppm           | -                 | 10/14                      | [5]       |
| Porous ZnO nanoplates                                     | 150                               | -               | -                 | 103/22                     | [6]       |

Based on different equipment and testing conditions, various gas-sensing materials show their features in chlorobenzene detection. The sensor materials in this work have enhanced response and selectivity compared to controlled ZnO sample, which also have acceptable chlorobenzene-sensing performance compared to results reported in the literature.

#### References:

- [1] T. X. Fu, *Analytical and Bioanalytical Chemistry*, 2011, **401**, 1167.
- [2] C. P. Gu, H. H. Huang, J. R. Huang, Z. Jin, H. X. Zheng, N. Liu, M. Q. Li, J. H. Liu and F. L. Meng, *Sensors and Actuators A*, 2016, **252**, 96.
- [3] Y. T. Wan, J. Y. Liu, W. Li, F. L. Meng, Z. Jin, X. Y. Yu, X. J. Huang and J. H. Liu, *Nanotechnology*, 2011, **22**, 315501.
- [4] Y. J. Tang and J. M. Ma, *RSC Advances*, 2014, **4**, 25692.
- [5] X. Han, Y. Sun, Z. Y. Feng, G. C. Zhang, Z. C. Chen and J. H. Zhan, *RSC Advances*, 2016, **6**, 37750.
- [6] Z. H. Jing and J. H. Zhan, *Advanced Materials*, 2008, **20**, 4547.
